# Supplementary material for: Autoxidation Kinetics of Tetrahydrobiopterin—Giving Quinonoid Dihydrobiopterin the Consideration It Deserves
Source: MDPI journal article supplement (doi:10.3390/molecules28031267), 2023-01-28
Supplement: s1 [file s1]

## Supplementary Materials

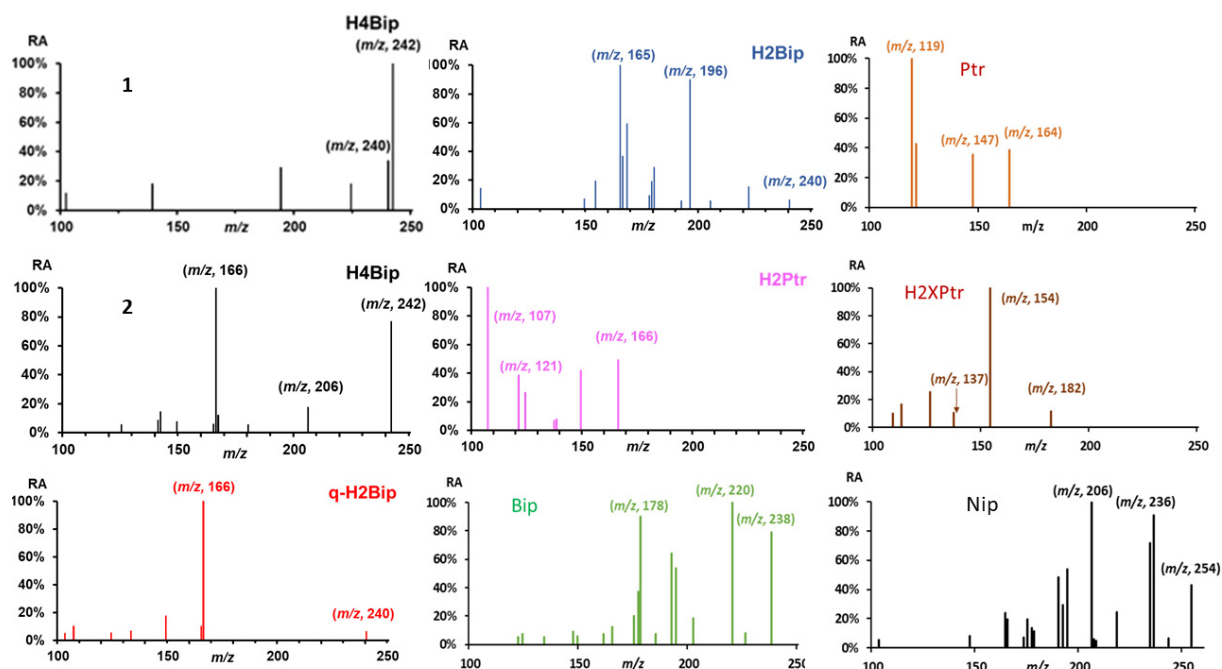

**Figure S1.** Extracted MS spectrum of H4Bip (1), and extracted MS/MS spectra of H4Bip (2), qH2Bip (Quinonoid dihydrobiopterin), H2Bip (7,8-Dihydrobiopterin), H2Ptr (Dihydropterin), Bip (biopterin), Ptr (Pterin), H2XPtr (di-hydroxy-xanthopterin), and Nip (neopterin). Chromatographic conditions are detailed in the experimental section.

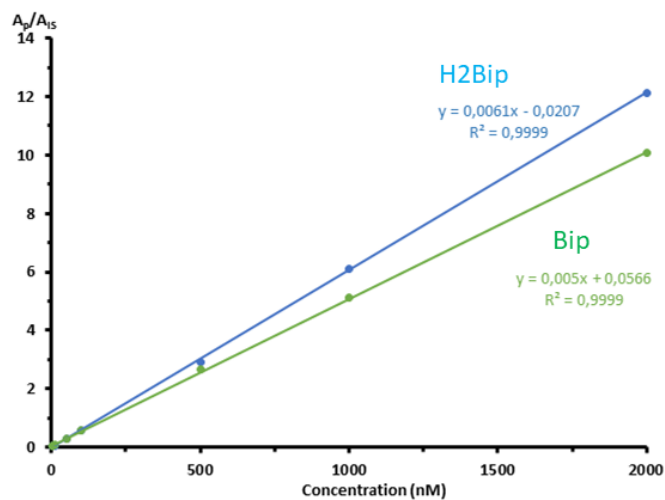

**Figure S2.** H2Bip and Bip quantification. Linearity of the method (5 -2000 nM,  $n = 6$ ).
